# Supplementary material
Source: PubMed Central journal article supplement (PMC5860608)
Supplement: btx627_supplementary_table.pdf [file btx627_supplementary_table.pdf]

**Supplementary Table 1.** Summary of cancer types and patient counts from The Cancer Genome Atlas that are included in this study.

| <b>Cancer Type (Abbreviation)</b>                                          | <b>Total Patients</b> | <b>Patients Analyzed<br/>(Patients Excluded)</b> |
|----------------------------------------------------------------------------|-----------------------|--------------------------------------------------|
| Adrenocortical carcinoma (ACC)                                             | 80                    | 80 (0)                                           |
| Bladder urothelial carcinoma (BLCA)                                        | 412                   | 407 (5)                                          |
| Brain lower grade glioma (LGG)                                             | 515                   | 508 (3)                                          |
| Breast invasive carcinoma (BRCA)                                           | 1098                  | 1065 (33)                                        |
| Cervical squamous cell carcinoma and<br>endocervical adenocarcinoma (CESC) | 308                   | 289 (19)                                         |
| Cholangiocarcinoma (CHOL)                                                  | 36                    | 36 (0)                                           |
| Colon adenocarcinoma (COAD)                                                | 459                   | 424 (35)                                         |
| Esophageal carcinoma (ESCA)                                                | 185                   | 184 (1)                                          |
| Head and neck squamous cell carcinoma (HNSC)                               | 528                   | 522 (6)                                          |
| Kidney chromophobe (KICH)                                                  | 66                    | 65 (1)                                           |
| Kidney renal clear cell carcinoma (KIRC)                                   | 536                   | 514 (22)                                         |
| Kidney renal papillary cell carcinoma (KIRP)                               | 291                   | 288 (3)                                          |
| Liver hepatocellular carcinoma (LIHC)                                      | 377                   | 366 (11)                                         |
| Lung adenocarcinoma (LUAD)                                                 | 521                   | 500 (21)                                         |
| Lung squamous cell carcinoma (LUSC)                                        | 504                   | 472 (32)                                         |
| Mesothelioma (MESO)                                                        | 87                    | 86 (1)                                           |
| Ovarian serous cystadenocarcinoma (OV)                                     | 585                   | 484 (101)                                        |
| Pancreatic adenocarcinoma (PAAD)                                           | 185                   | 177 (8)                                          |
| Pheochromocytoma and paraganglioma (PCPG)                                  | 179                   | 179 (0)                                          |
| Prostate adenocarcinoma (PRAD)                                             | 498                   | 494 (4)                                          |
| Rectal adenocarcinoma (READ)                                               | 171                   | 155 (16)                                         |
| Sarcoma (SARC)                                                             | 261                   | 259 (0)                                          |
| Skin cutaneous melanoma (SKCM)                                             | 570                   | 96 (474)                                         |
| Stomach adenocarcinoma (STAD)                                              | 443                   | 413 (13)                                         |
| Testicular germ cell tumor (TGCT)                                          | 150                   | 134 (16)                                         |
| Thyroid carcinoma (THCA)                                                   | 507                   | 505 (2)                                          |
| Thymoma (THYM)                                                             | 124                   | 123 (1)                                          |
| Uterine corpus endometrial carcinoma (UCEC)                                | 548                   | 536 (12)                                         |
| Uterine carcinosarcoma (UCS)                                               | 57                    | 56 (1)                                           |
| Uveal melanoma (UVM)                                                       | 80                    | 80 (0)                                           |
| <b>Total</b>                                                               | <b>10,361</b>         | <b>9,497 (864)</b>                               |
